# Supplementary material for: Molecular characterization of pro-metastatic functions of β4-integrin in colorectal cancer
Source: Oncotarget. 2017 Sep 27;8(54):92333–45. doi: 10.18632/oncotarget.21290 (PMC5696185; doi:10.18632/oncotarget.21290)
Supplement: Supplementary file 1 [file oncotarget-08-92333-s001.pdf]

## Molecular characterization of pro-metastatic functions of $\beta$ 4-integrin in colorectal cancer

### SUPPLEMENTARY MATERIALS

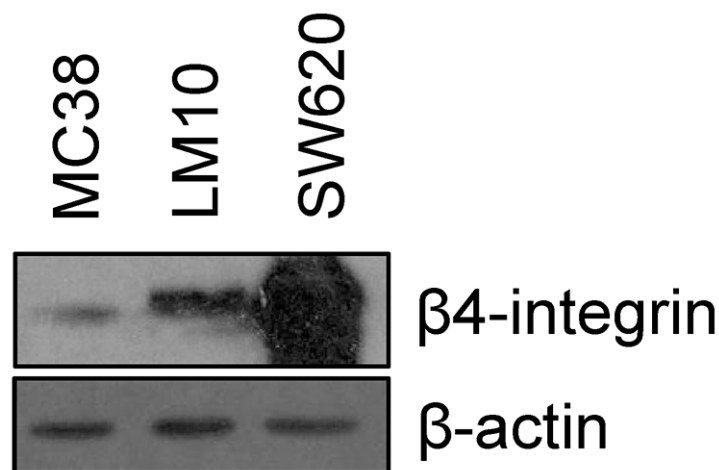

Supplementary Figure 1: Protein expression levels of  $\beta$ 4-integrin in MC38, LM10, SW620 cells were analyzed by western blot analyses using antibodies against both human and mouse  $\beta$ 4-integrin.

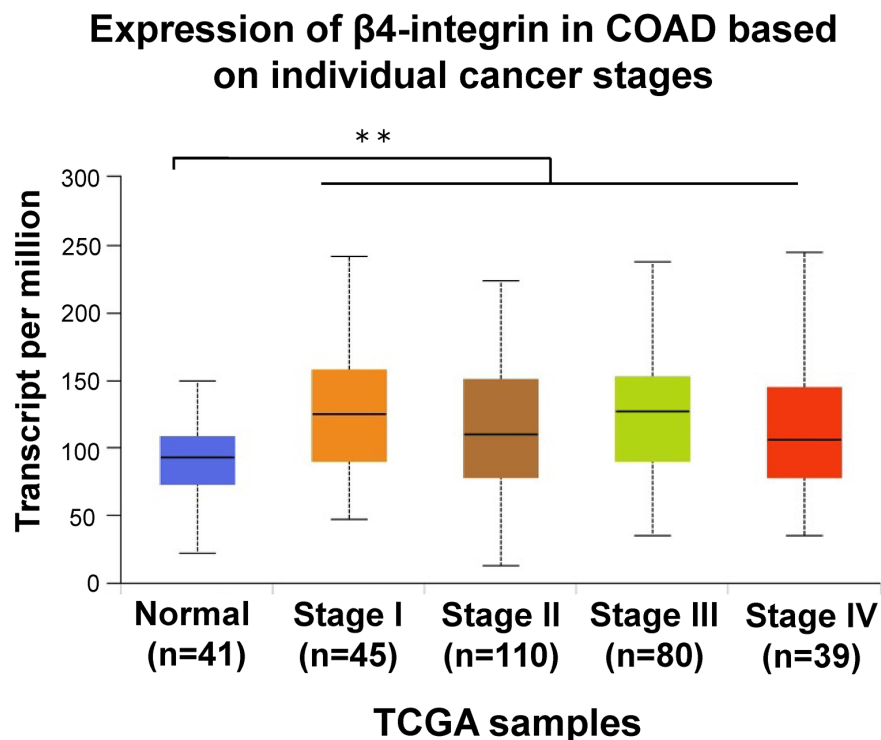

Supplementary Figure 2: TCGA data of 274 colorectal adenocarcinoma (COAD) patients and 41 controls were downloaded from UALCAN: <http://ualcan.path.uab.edu/index.html> and presented in a box plot.

## Supplementary Excel File 1: Gene microarray data.

## See Supplementary File 1

Supplementary Table 1: Clinical and pathologic characteristics for high and low  $\beta 4$ -integrin expression in human CRC samples

|                         | N  | High N=50       | Low N=18        | Combined N=68   | P-value            |
|-------------------------|----|-----------------|-----------------|-----------------|--------------------|
| Age, (y, mean $\pm$ SD) | 67 | 63.3 $\pm$ 15.7 | 65.0 $\pm$ 14.1 | 63.8 $\pm$ 15.2 | 0.939 <sup>1</sup> |
| Sex                     | 67 |                 |                 |                 | 0.42 <sup>2</sup>  |
| F                       |    | 51.0% (25)      | 38.9% (7)       | 47.8% (32)      |                    |
| M                       |    | 49.0% (24)      | 61.1% (11)      | 52.2% (35)      |                    |
| Site                    | 62 |                 |                 |                 | 0.046 <sup>2</sup> |
| Right                   |    | 55.6% (25)      | 29.4% (5)       | 48.4% (30)      |                    |
| Left                    |    | 24.4% (11)      | 58.8% (10)      | 33.9% (21)      |                    |
| Rectum                  |    | 20.0% (9)       | 11.8% (2)       | 17.7% (11)      |                    |
| Tumor size (cm)         | 62 | 5.63 $\pm$ 2.71 | 4.94 $\pm$ 1.92 | 5.45 $\pm$ 2.53 | 0.273 <sup>1</sup> |
| Tumor size cat.         | 62 |                 |                 |                 | 0.147 <sup>2</sup> |
| < 5cm                   |    | 39.1% (18)      | 62.5% (10)      | 45.2% (28)      |                    |
| $\geq$ 5cm              |    | 60.9% (28)      | 37.5% (6)       | 54.8% (34)      |                    |
| Grade                   | 68 |                 |                 |                 | 0.315 <sup>2</sup> |
| 1                       |    | 14.0% (7)       | 22.2% (4)       | 16.2% (11)      |                    |
| 2                       |    | 70.0% (35)      | 50.0% (9)       | 64.7% (44)      |                    |
| 3                       |    | 16.0% (8)       | 27.8% (5)       | 19.1% (13)      |                    |
| Advancing edge          | 66 |                 |                 |                 | 0.576 <sup>2</sup> |
| Infiltrative            |    | 55.1% (27)      | 64.7% (11)      | 57.6% (38)      |                    |
| Pushing                 |    | 44.9% (22)      | 35.35 (6)       | 42.4% (28)      |                    |
| Mesenteric deposits     | 65 |                 |                 |                 | 1 <sup>2</sup>     |
| 0                       |    | 77.1% (37)      | 76.5% (13)      | 76.9% (50)      |                    |
| 1                       |    | 22.9% (11)      | 23.5% (4)       | 23.1% (15)      |                    |
| Vascular invasion       | 66 |                 |                 |                 | 0.124 <sup>2</sup> |
| Absent                  |    | 75.5% (37)      | 52.9% (9)       | 69.7% (46)      |                    |
| Present                 |    | 24.5% (12)      | 47.1% (8)       | 30.3% (20)      |                    |
| Perineural invasion     | 65 |                 |                 |                 | 0.278 <sup>2</sup> |
| 0                       |    | 95.8% (46)      | 88.2% (15)      | 93.8% (61)      |                    |
| 1                       |    | 4.2% (2)        | 11.8% (2)       | 6.2% (4)        |                    |
| Crohn's-like reaction   | 65 |                 |                 |                 | 0.778 <sup>2</sup> |
| 0                       |    | 54.2% (26)      | 47.1% (8)       | 52.3% (34)      |                    |
| 1                       |    | 45.8% (22)      | 52.9% (9)       | 47.7% (31)      |                    |

N is the number of non-missing values. Numbers after percentages are frequencies. Tests used: <sup>1</sup>Wilcoxon test; <sup>2</sup>Fisher's Exact test
